# Supplementary material for: Solvent-responsive solid/liquid phase transitions of condensates depend on trade-off molecular interactions
Source: Research Square preprint supplement (doi:10.21203/rs.3.rs-7393420/v1), 2025-08-29
Supplement: Supplementary file 1 [file 6af410278c7ec6938c251221.pdf]

## Supporting information for

# **Solvent-responsive solid/liquid phase transitions of condensates depend on trade-off molecular interactions**

Feipeng Chen<sup>1,4,7</sup>, Yongxu Han<sup>2</sup>, Huiyanchen Li<sup>4</sup>, Xiufeng Li<sup>4,5</sup>, Wei Guo<sup>1,4</sup>, Changjin Wu<sup>1,4</sup>, Jiang Xia<sup>2</sup>, Xiangze Zeng<sup>3\*</sup>, Ho Cheung Shum<sup>1,4,6\*</sup>

<sup>1</sup>Department of Mechanical Engineering, The University of Hong Kong, Pokfulam Road, Hong Kong (SAR) 999077, China

<sup>2</sup>Department of Chemistry, The Chinese University of Hong Kong, Shatin, Hong Kong, China

<sup>3</sup>Department of Physics, Hong Kong Baptist University, Kowloon Tong, Hong Kong, China

<sup>4</sup>Advanced Biomedical Instrumentation Centre, Hong Kong Science Park, Shatin, New Territories, Hong Kong (SAR) 999077, China

<sup>5</sup>College of Food Science and Technology, Nanjing Agricultural University, Nanjing, 210095, Jiangsu, China

<sup>6</sup>Department of Biomedical Engineering & Department of Chemistry, City University of Hong Kong, Kowloon, Hong Kong, China.

<sup>7</sup>Current address: Department of Chemical and Biological Engineering, Northwestern University, Evanston, Illinois 60208, United States

\*Corresponding author. Email: xiangzezeng@hkbu.edu.hk; ashum@cityu.edu.hk

**Supplementary Table 1:** Inconsistent effects of organic solvents on the phase transitions of coacervates or condensates reported in literature.

| Material                                     | Organic Solvent          | Effect | reference |
|----------------------------------------------|--------------------------|--------|-----------|
| amyloid- $\beta$ (A $\beta$ )                | Ethanol                  | SLPT   | [1, 2]    |
| Lysozyme                                     | Ethanol                  | SLPT   | [3, 4]    |
| PSS/PVBtMA                                   | Ethanol, ethylene glycol | SLPT   | [5]       |
| PAAcate/ QCS-Tf2N                            | DMSO                     | SLPT   | [6]       |
| PSS/P3BImHTBr                                | Tetrahydrofuran          | SLPT   | [7]       |
| keratin-8 protein                            | Ethanol                  | LSPT   | [8]       |
| <sup>179</sup> CVNITV <sup>184</sup> protein | Ethanol                  | LSPT   | [9]       |
| Chitosan/ Hyaluronic Acid                    | Ethanol, methanol        | LSPT   | [10]      |
| PDDPC/PVS;<br>PDDPC/PAA                      | Ethanol                  | LSPT   | [11]      |
| BPEI/PAA                                     | Ethanol, methanol, etc.  | LSPT   | [12]      |

PSS: Poly(sodium 4-styrenesulfonate)

PVBtMA: Poly[(vinylbenzyl)trimethylammonium chloride]

PAAcate: Poly(acrylic acid) functionalized with catechols

QCS-Tf2N: Chitosan ion-paired with bis(trifluoromethane-sulphonyl)imide

P3BImHTBr: poly[3-[6' -(N-butylimidazolium)-hexyl]thiophene]bromide

PDDPC: Poly(N,N-dimethyl-3,5-dimethylene piperidinium chloride)

PVA: Polyvinylamine

PAA: Poly(acrylic acid)

PVS: poly(vinylsulfonic acid, sodium salt)

BPEI: branched poly(ethylene imine)



**Supplementary Table 2:** Plasmids, vectors, and amino acid sequence of RGG and ELP proteins

| Protein | Plasmids                   | Vector   | Sequence                                                                                                                                                                                                                                                                                                                                                                                                                                                                                  |
|---------|----------------------------|----------|-------------------------------------------------------------------------------------------------------------------------------------------------------------------------------------------------------------------------------------------------------------------------------------------------------------------------------------------------------------------------------------------------------------------------------------------------------------------------------------------|
| RGG     | RGGRGG-EGFP                | Pet 21 a | MKGSSHHHHH HVDAHIVMD AYKPTKLDGH GVGVPGVGVP GVGVPGEVGP GVGVPGVGVP<br>GVGVPGVGVP GEGVPGVGVP GVGVPGVGVP GVGVPGEVGP GVGVPGVGEL PEDLGTGLLE<br>ALLRGDLAGA EALFRRGLRF WGPEGVLEHL LLPVLREVGE AWHRGEIGVA EEHLASTFLR<br>ARLQELDLA GFPPGPPVLV TTPPERHEI GAMLAAYHLR RKGVPALYLG PDTPLPDLRA<br>LARRLGAGAV VLSAVLSEPL RALPDGALKD LAPRVFLGGQ GAGPEEARRL GAEYMEDLKG<br>LAEALWLPRG PEKEAITSVP GVGVPGVGVP GEGVPGVGVP GVGVPGVGVP GVGVPGEVGP<br>GVGVPGVGVP GVGVPGVGVP GEGVPGVGVP GVGVPGLLD AHIVMVDAYK PTKLEWKK |
| ELP     | SpyTag-Elp-CarH-Elp-SpyTag | pQE-80L  | MESNQSNNNG SGNAALNRGG RYVPPHLRGG DGGAAAAASA GGDDRRGGAG GGGYRRGGGN<br>SGGGGGGGYD RGYNDNRDDR DNRGGSGGYG RDRNYEDRGY NGGGGGGGR GYNNNRGGGG<br>GGYNRQDRGD GGSSNFSRGG YNNRDEGSDN RSGRSYNND RRDNGGDGES NQSNNGGSGN<br>AALNRGGRYV PPHLRGGDGG AAAAASAGGD DRRGGAGGGG YRRGGGNSGG GGGGGYDRGY<br>NDNRDDRDNR GSGGGYGRDR NYEDRGYNGG GGGGGNRGYN NNRGGGGGGY NRQDRGDGGS<br>SNFSRGGYNN RDEGSDNRGS GRSYNNDRRD NGGDG                                                                                             |

## Supplementary Note 1: Estimation of different driving forces affected by the introduction of organic solvents.

Molecular interactions, such as electrostatic interaction, cation -  $\pi$ , and  $\pi$  -  $\pi$ , are the main driving forces for the complex coacervation. Therefore, to investigate the effects of solvents on complex coacervations, we further examine the changes of molecular interaction energy based on theoretical models upon the introduction of organic solvents. For coacervates formed by oppositely charged polyelectrolytes with relatively hydrophilic sidechains, the main driving force for the phase separation is assumed to be the electrostatic interaction. For disconnected ions with diameters  $\sigma = v^{1/3}$ , electrostatic free energy is given by a generalized Debye–Hückel expression as[13, 14],

$$f_{el} = -\frac{1}{4\pi v} \left[ \ln(1 + \kappa\sigma) - \kappa\sigma + \frac{(\kappa\sigma)^2}{2} \right] \quad (1)$$

where  $\kappa$  is the inverse Debye screening length[15] given by  $\kappa\sigma = \sqrt{4\pi(l_B/\sigma) \sum \phi_i f_i}$  with Bjerrum length  $l_B = e^2/4\pi k_B T \epsilon_0 \epsilon_s$  (where  $f_i$  is the charge density of polymers or salts,  $e$  is the elementary charge,  $\epsilon_0$  is the vacuum permittivity,  $\epsilon_s$  is the dielectric constant of the solvent). In the dilute limit,  $\phi_i \rightarrow 0$ , Eq. 1 reduces to well-known Debye–Hückel correlation free energy as used in Voorn-Overbeek (VO) theory[16],

$$f_{el} = -\kappa^3/12\pi. \quad (2)$$

For simplicity, Eq. 2 is used to calculate electrostatic free energy in our work. Based on Eq. 2,  $f_{el}$  scales with  $(l_B)^{3/2}$  and thus  $(\epsilon_r)^{-3/2}$ , as  $f_{el} \propto (l_B)^{3/2} \propto (\epsilon_r)^{-3/2}$ . This indicates the electrostatic interaction is enhanced when the the dielectric constant of solvent decrease upon the introduction of organic solvents into water.

For coacervates formed by oppositely charged polyelectrolytes with aromatic residues, cation- $\pi$  and  $\pi$  -  $\pi$  interactions play important roles in the complex coacervation[17, 18]. Apart from electrostatic interactions between two charges, all other interactions involve polarization effects for molecules of polarizability  $\alpha$ . This is because all atoms and molecules are polarizable and the polarizability arise from the displacement of its negatively charged electron cloud relative to the positively charged nucleus under the influence of an external electric field [19]. Therefore, the energetic

contributions from these short-range interactions in a solvent medium can be modeled as [19],

$$f_{sr} = -\frac{3kT}{r^6} \left( \frac{\varepsilon_p - \varepsilon_s}{\varepsilon_p + 2\varepsilon_s} \right)^2 \alpha^6, \quad (4)$$

where  $\varepsilon_p$  and  $\varepsilon_s$  are the dielectric constant of molecules and solvents, respectively. Based on the Eq. 4, it is shown that  $f_{sr}$  scales with  $\left( \frac{\varepsilon_p - \varepsilon_s}{\varepsilon_p + 2\varepsilon_s} \right)^2$ . The dielectric constant of water  $\varepsilon_w$  and ethanol  $\varepsilon_e$  at room temperature ( $T = 20^\circ\text{C}$ ) are 80.2 and 24.3, respectively. The dielectric constant of a mixture of water and ethanol can be calculated as  $\varepsilon_s = \varphi_e \varepsilon_e + (1 - \varphi_e) \varepsilon_w$  [20]. With this,  $\varepsilon_s$  decrease monotonically with increasing  $\varphi_e$  upon the introduction of ethanol into water. Therefore, it is found that  $f_{sr}$  continues to decrease with decreasing value of  $\varepsilon_s$ , suggesting that the strength of cation- $\pi$  and  $\pi$ - $\pi$  interactions are reduced in the presence of organic solvents.

## Supplementary Note 2: Time-ethanol and time-temperature superposition reveals changes in interaction strength

To better understand the variations in physical properties and molecular interactions within coacervates affected by alcohols, we employ a superposition method to analyze the rheology data. Superposition is a well-known rheological principle to study the response of viscoelastic materials over a broad range of frequencies [10, 21]. We first conduct frequency sweeps on two exemplary complex coacervates, PAA/PDMAEMA and PVS/PVBTMA, at different volume fractions of ethanol and temperatures. The overall shape of rheology curves of these coacervates is typical of polymer melt with viscoelastic properties being dominated by the loss modulus ( $G''$ ) at low frequency and the storage modulus ( $G'$ ) at high frequency (Supplementary Fig. 7 and Supplementary Fig. 8).

Consistent with the previous observations and our hypothesis, the presence of ethanol leads to significant decrease in  $G'$  and  $G''$  of PVS/PVBTMA coacervates containing aromatic residues, whereas it increases  $G'$  and  $G''$  of PAA/PDMAEMA coacervates lacking aromatic residues (Supplementary Fig. 7). By employing a time-ethanol superposition where the frequency and modulus are multiplied by a critical relaxation time ( $\tau_c$ ) and a vertical shift factor  $b_\phi$ , frequency sweeps conducted at different volume fractions of ethanol ( $\phi_e$ ) are rescaled onto master curves (Supplementary Fig. 9a and Supplementary Fig. 9b). The successful application of time-alcohol superpositions implies that these coacervates remain self-similar and homogeneous structures. Therefore, studying the viscoelastic properties of coacervates at different conditions is equivalent to examining them at different time scales [10, 22]. Intriguingly, in the time-ethanol superpositions,  $\tau_c$  and  $b_\phi$  of PVS/PVBTMA coacervates decrease, while those of PAA/PDMAEMA coacervates increase. In particular, the trend of  $\tau_c$  over  $\phi_e$  can be effectively captured by linear functions in semilog plots (Supplementary Fig. 9d and Supplementary Fig. 9e), in line with previous studies [10]. The  $\tau_c$  is physically determined by an energy barrier  $E$  of associated interactions between stickers on polymer chains and environmental temperature  $T$ , as  $\tau_c \sim \exp(E/k_B T)$ , where  $k_B$  is the Boltzmann constant [21]. With this relationship, these results suggest that interaction strength within coacervates scale linearly with the volume fraction of ethanol. Differently, the interaction strength within PAA/PDMAEMA coacervates increase over  $\phi_e$ , while that within PVS/PVBTMA coacervates decreases.

Moreover, it is found that  $G'$  and  $G''$  of these two coacervates monotonically decrease with increasing temperature (Supplementary Fig. 8). In addition, the critical frequency at which  $G'$  equals  $G''$  shift toward higher frequencies, suggesting faster relaxation and more liquid-like properties at the high temperature (Supplementary Fig. 8). By applying a time-temperature superposition, frequency sweeps at different temperatures can be rescaled onto a single master curve using  $T = 20\text{ }^{\circ}\text{C}$  as the reference point (Supplementary Fig. 10a and Supplementary Fig. 10b), with  $w_{scale} = w\tau_c$ ,  $G'_{scale} = G'_{scale}b_T$ , and  $G''_{scale} = G''_{scale}b_T$ . It is observed that  $\tau_c$  and  $b_T$  continually decrease with increasing temperature (Supplementary Fig. 10c). The trend of  $\tau_c$  over  $T$  can be well fitted by the relationship of  $\tau_c \sim \exp(E/k_B T)$  in a semilog coordinate (Supplementary Fig. 10c). These results suggest that temperature can induce a melting of coacervates, regardless of their different sidechain compositions.



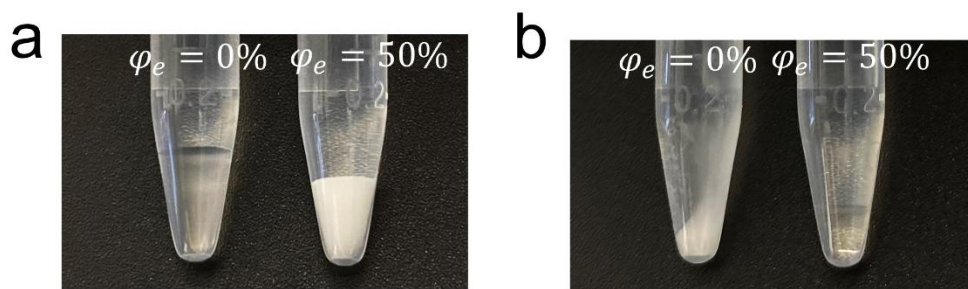

**Supplementary Fig. 1.** Photographs of (a) DEX-Sulf/DEAE-DEX (2.5 wt%/5 wt%) and (b) PSS/PDDA ( $c_m = 50$  mM and  $c_s = 1.5$  M) coacervates prepared at different volume fraction of ethanol ( $\varphi_e = 0\%$  and  $\varphi_e = 50\%$ ).

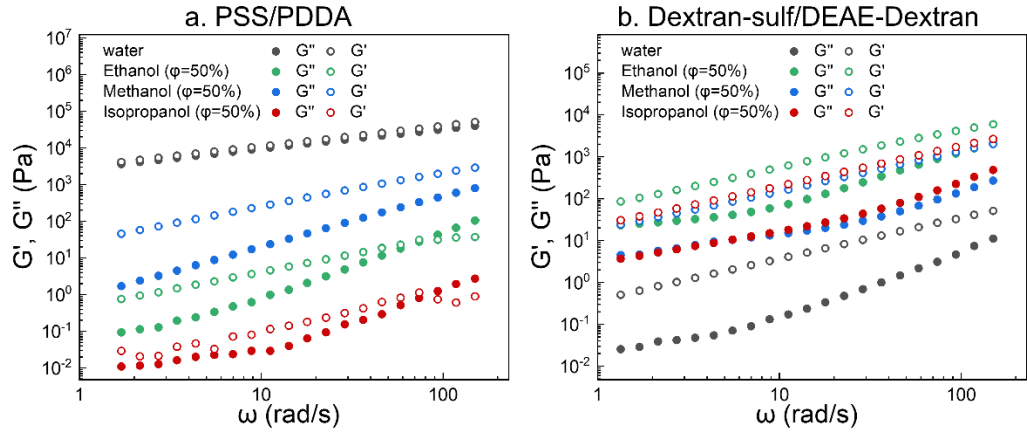

**Supplementary Fig. 2.** Frequency sweeps of (a) PSS/PDDA ( $c_m = 50$  mM and  $c_s = 1.5$  M) and (b) Dextran-sulf (2.5 wt%)/DEAE-Dextran (5 wt%), formed at four different solvent conditions: water, water/ethanol (1:1 v/v), water/methanol (1:1 v/v), and water/isopropanol (1:1 v/v).

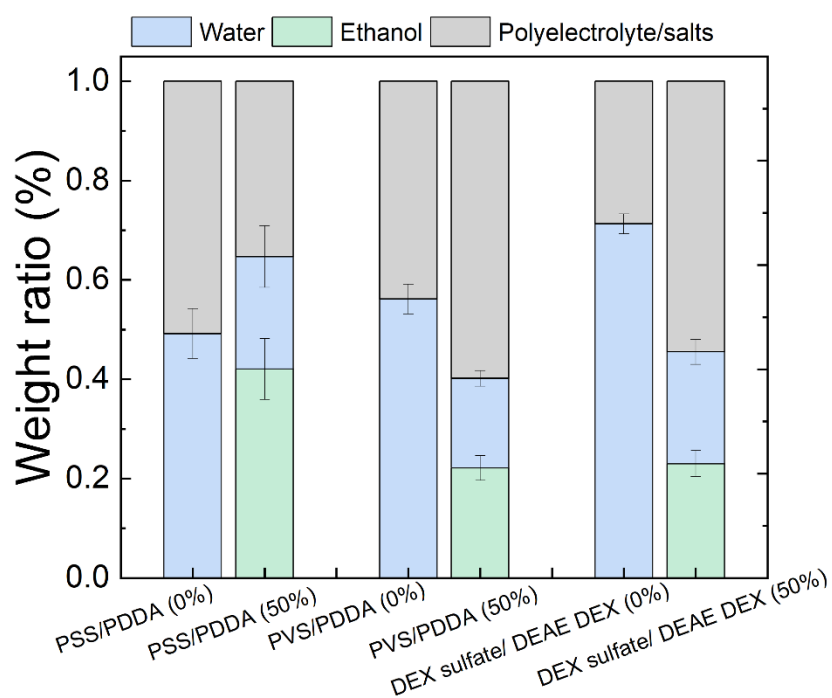

**Supplementary Fig. 3.** Thermogravimetric analysis of weight ratios of water, ethanol, and polyelectrolyte/salt in different types of coacervate phases at aqueous solution and water/ethanol (1:1 v/v) mixture. At least three independent samples are measured to calculate a mean value and standard deviation (error bars).

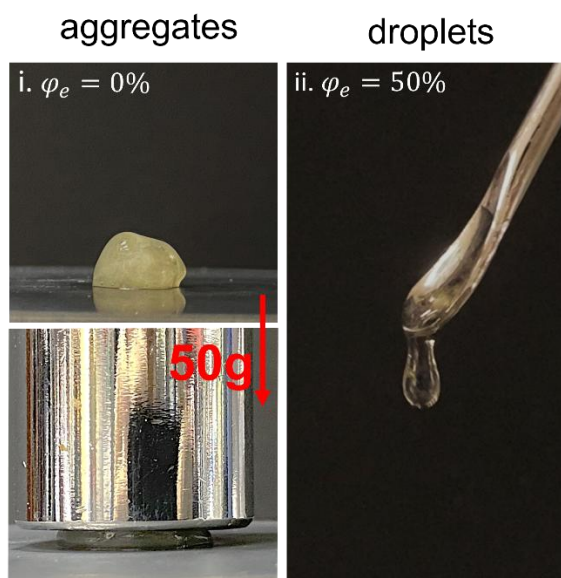

**Supplementary Fig. 4.** Photographs of PSS/PDDA coacervates formed at different volume fractions of ethanol. Coacervates exhibit as solid-like aggregates in pure water ( $\varphi_e = 0\%$ ) and can bear heavy loads, while coacervates formed at  $\varphi_e = 50\%$  v behave as liquid which readily drip off from a spoon.

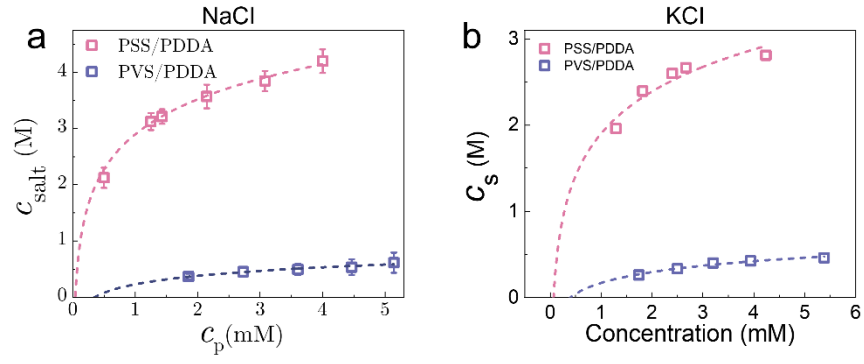

**Supplementary Fig. 5.** Left arms of phase diagram for PSS/PDDA (pink dash line) and PVS/PDDA (violet dash line) coacervates using (a) NaCl and (b) KCl salt.

a. PVS-PDDA

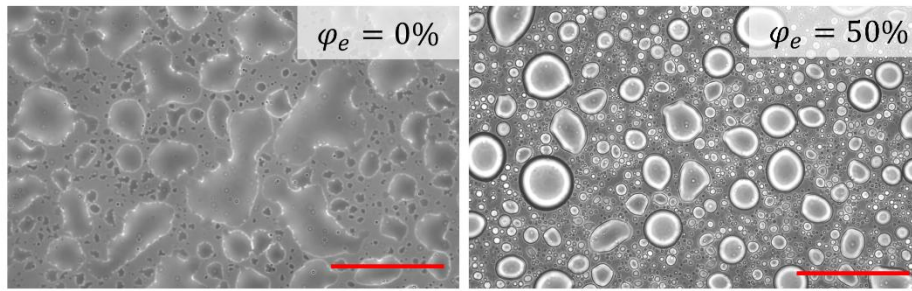

b. PVS-PLL

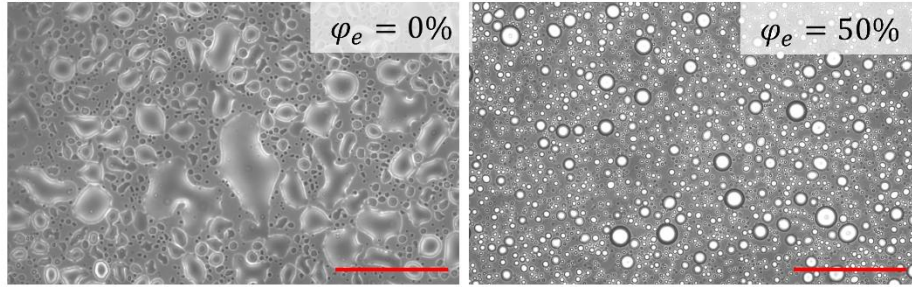

**Supplementary Fig. 6.** Bright-field images of (a) PVS/PDDA and (b) PVS/PLL coacervates. Images were acquired after depositing solutions onto cover slides and allowing approximately 10 minutes for complete wetting of coacervate droplets to the substrate. Scale bars: 100  $\mu\text{m}$ .

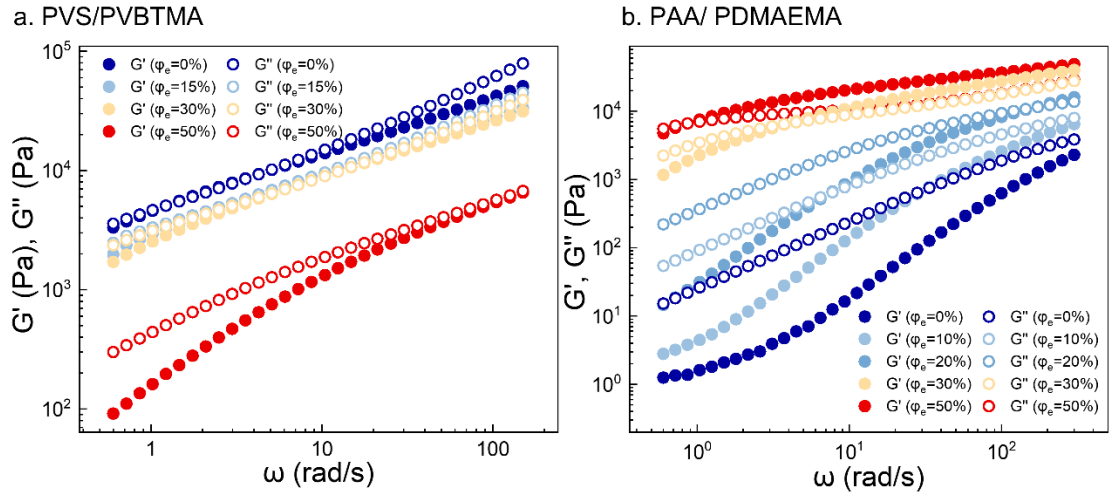

**Supplementary Fig. 7.** Frequency sweeps of (a) PVS/PVBTMA and (b) PAA/PDMAEMA coacervates at different volume fractions of ethanol ( $\varphi_e$ ). The storage modulus  $G'$  and loss modulus  $G''$  of PVS/PVBTMA coacervates monotonically decrease over  $\varphi_e$ , while that of PAA/PDMAEMA coacervate increase as  $\varphi_e$  increases.

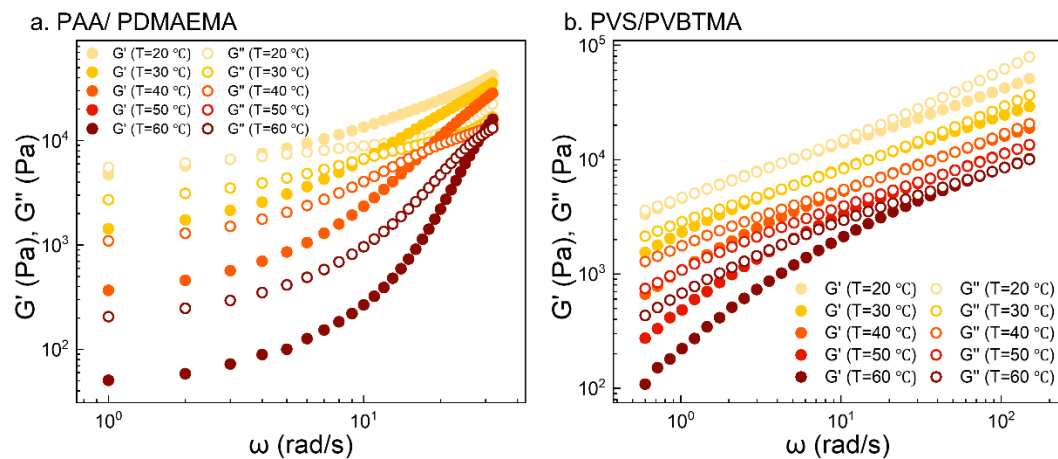

**Supplementary Fig. 8.** Frequency sweeps of (a) PAA/PDMAEMA and (b) PVS/PVBTMA at various temperatures. The storage modulus  $G'$  and loss modulus  $G''$  of PAA/PDMAEMA and PVS/PVBTMA coacervates monotonically decrease with the increasing temperature.



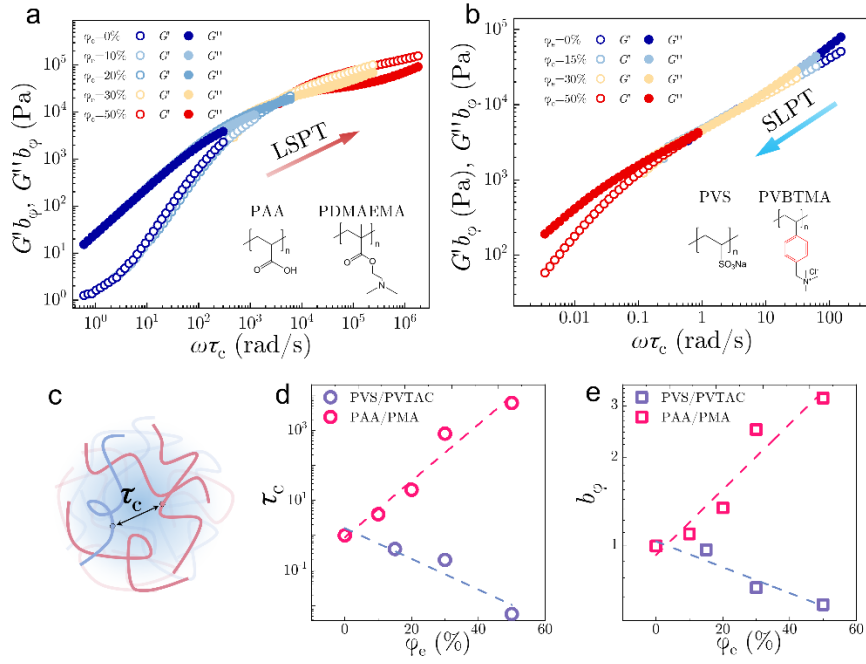

**Supplementary Fig. 9.** Time-alcohol superposition plots of (a) PAA/PDMAEMA and (b) PVS/PVBTMA complex coacervates. The insert images show the chemical structures of polyelectrolytes. The concentration of charged monomer  $c_m$  is 50 mM for all polyelectrolytes and coacervates are therefore formed at a neutral stoichiometry. Frequency sweeps conducted at various volume fractions of ethanol ( $\varphi_e$ ) are used for the time-alcohol superposition (Supplementary Fig. 7). The LSPT and SLPT are identified for these two coacervates, respectively. (c) Schematic illustration of the critical relaxation time  $\tau_c$  which is related to the interactions between associative residues. (d) (e) Values of the critical relaxation time  $\tau_c$  and vertical shift factors  $b_\varphi$  as a function of  $\varphi_e$ . The dashed lines are linear fittings to experimental points in the semi-logarithmic plots.

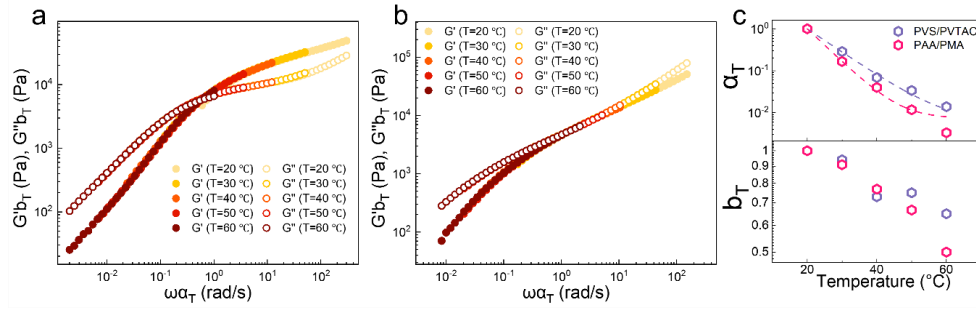

**Supplementary Fig. 10.** Rescaled frequency sweeps of (a) PAA/PDMAEMA and (b) PVS/PVBTMA at different temperatures by multiplying the frequency and modulus by horizontal and vertical shift factors,  $\alpha_T$  and  $b_T$ , respectively. (c) Values of  $\alpha_T$  and  $b_T$  as a function of temperature. Experimental data of  $\alpha_T$  over  $T$  are fitted using the expression  $\alpha = k \exp(E/k_B T)$  as indicated by the dash lines.

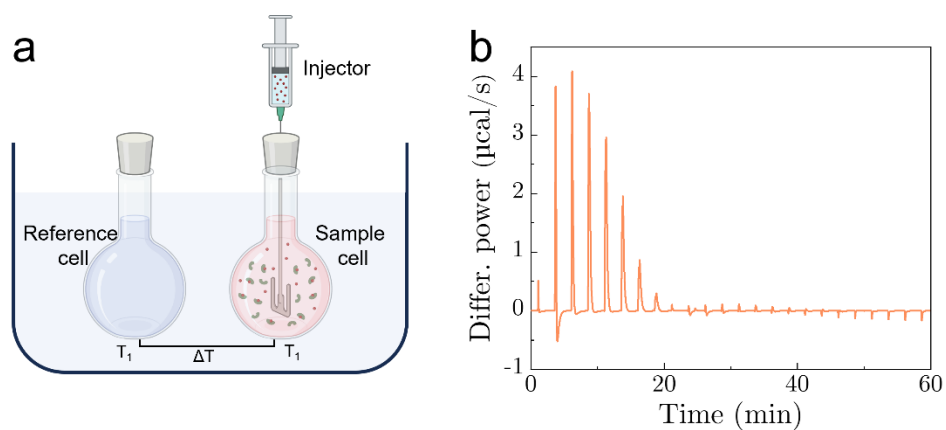

**Supplementary Fig. 11.** (a) Schematic illustration of configurations of isothermal titration calorimetry. (b) The differential power (DP) required to maintain a constant temperature for the isothermal injection of PVS ( $c_m = 1 \text{ mM}$ ) into a cell containing PLL ( $c_m = 20 \text{ mM}$ ).

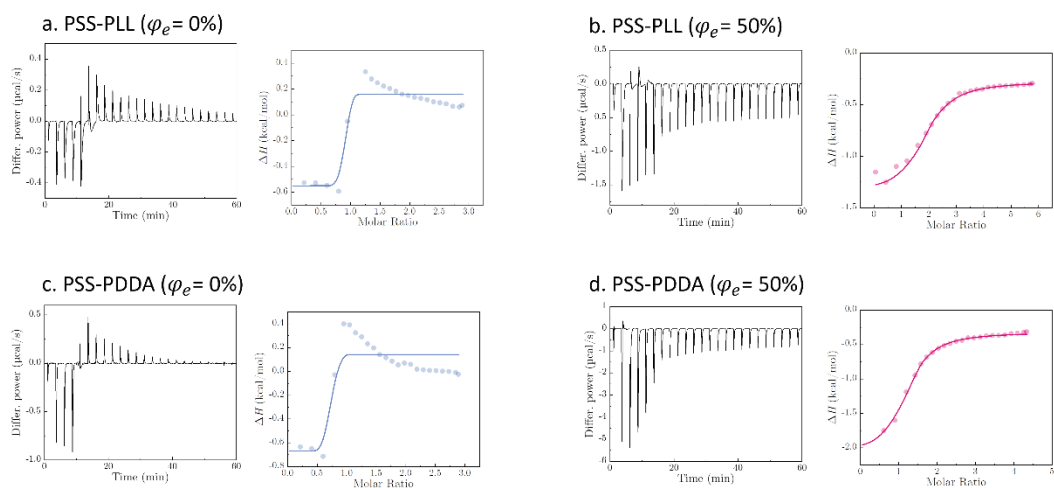

**Supplementary Fig. 12.** Plots of differential power (DP) signal versus time and enthalpy change  $\Delta H$  versus time PSS/PLL and PSS/PDDA coacervate at  $\varphi_e = 0\%$  and  $\varphi_e = 50\%$ . The experimental conditions are (a) PSS (0.5 mM), PLL (7.5 mM), and  $\varphi_e = 0\%$ ; (b) PSS (0.5 mM), PLL (15 mM), and  $\varphi_e = 50\%$ ; (c) PSS (0.5 mM), PDDA (7.5 mM), and  $\varphi_e = 0\%$ ; (d) PSS (0.5 mM), PDDA (11.25 mM), and  $\varphi_e = 50\%$ .

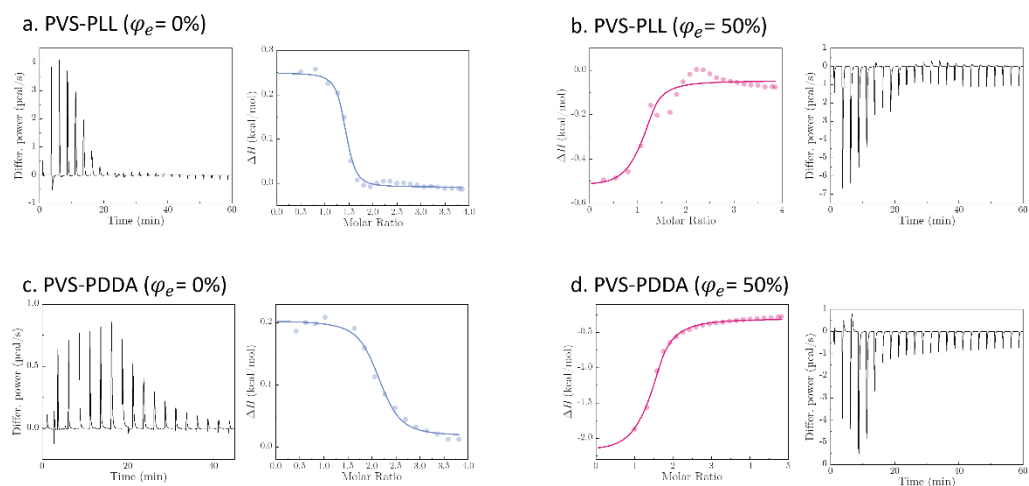

**Supplementary Fig. 13.** Plots of differential power (DP) signal versus time and enthalpy change  $\Delta H$  versus time PSS/PLL and PSS/PDDA coacervate at  $\phi_e = 0\%$  and  $\phi_e = 50\%$ . The experimental conditions are (a) PVS (1 mM), PLL (20 mM), and  $\phi_e = 0\%$ ; (b) PVS (1 mM), PLL (20 mM), and  $\phi_e = 50\%$ ; (c) PVS (1 mM), PDDA (20 mM), and  $\phi_e = 0\%$ ; (d) PVS (1 mM), PDDA (25 mM), and  $\phi_e = 50\%$ .

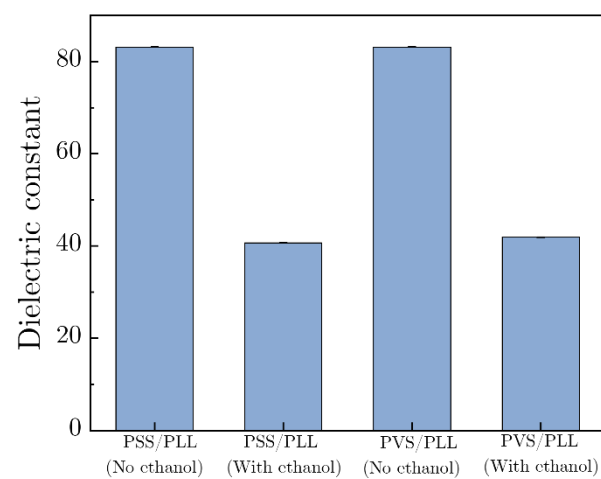

**Supplementary Fig. 14.** The computed values of dielectric constant of solutions containing oppositely charged monomers.

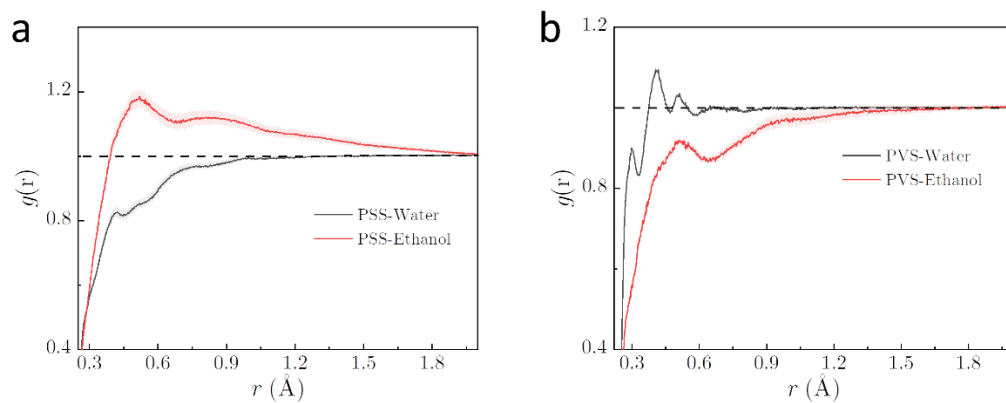

**Supplementary Fig. 15.** Radial distribution function of water (the dark lines) and ethanol (the red lines) molecules surrounding (a) PSS and (b) PVS, respectively.

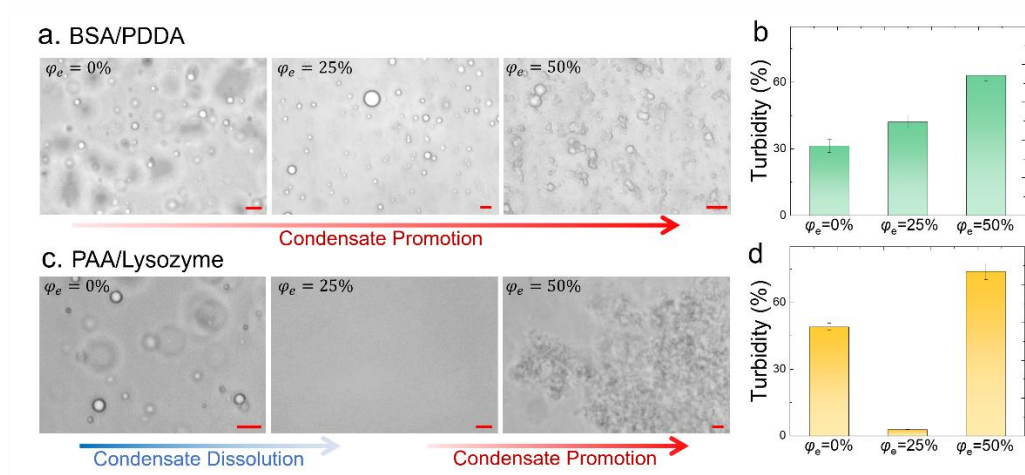

**Supplementary Fig. 16.** (a) Bright-field images and (b) solution turbidity showing that condensates formed by BSA (2 wt%) and PDDA (1 wt%) are promoted as  $\varphi_e$  increases. (c) Bright-field images and (d) solution turbidity showing that condensates formed by PAA (0.125 wt%) and Lysozyme (2 wt%) are firstly dissolved and then promoted to form solid-like aggregates with increasing  $\varphi_e$ . Scale bars are 20  $\mu\text{m}$ .



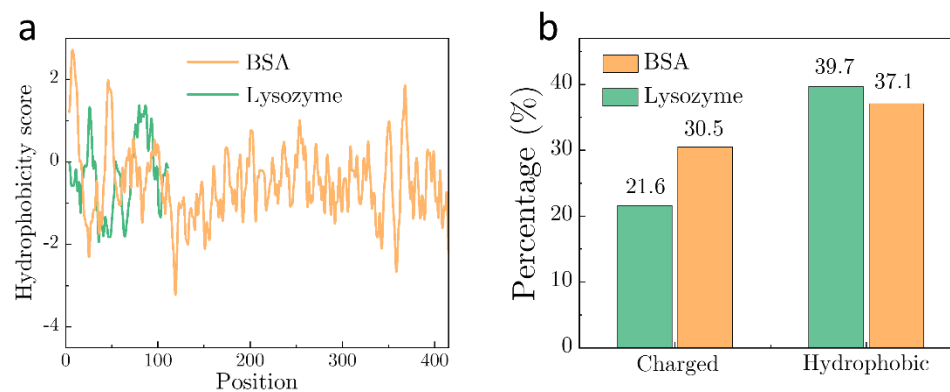

**Supplementary Fig. 17.** (a) Hydrophobicity scores and amino acid compositions of BSA and Lysozyme protein sequences using the Kyte-Doolittle scale [23].

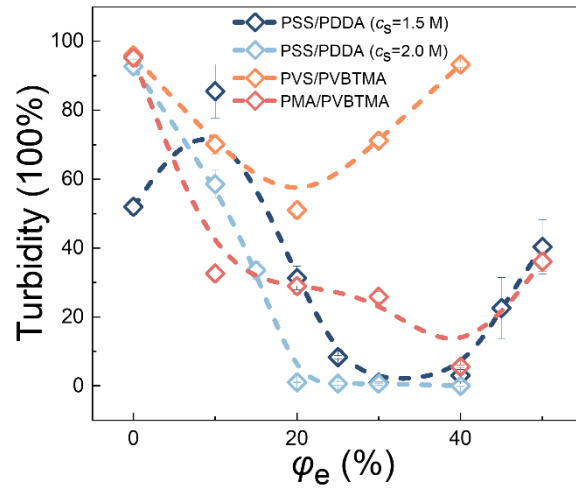

**Supplementary Fig. 18.** Solution turbidity of coacervates as a function of volume fraction of ethanol  $\phi_e$ . These curves present a re-entrant phase separation of coacervates mediated by ethanol. Coacervates are PSS (50 mM)/PDDA (50 mM) with 1.5 M NaCl, PSS (50 mM)/PDDA (50 mM) with 2.0 M NaCl, PVS(50 mM)/PVBTMA(50 mM), and PMA(50 mM)/PVBTMA(50 mM), respectively.

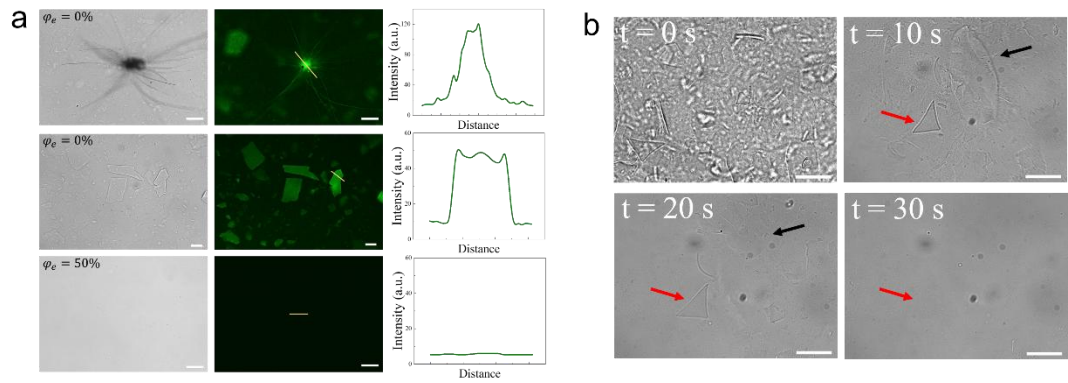

**Supplementary Fig. 19.** (a) Bright-field and fluorescence images of A $\beta$  1-42 plaques formed at different volume fraction of ethanol  $\varphi_e$ . A $\beta$  1-42 plaques were dyed by Thioflavin T (ThT). (b) Bright-field images showing the fast dissolution of A $\beta$  1-42 plaques by the introduction of ethanol at  $\varphi_e = 50\%$ . Scale bars are 20  $\mu\text{m}$ .

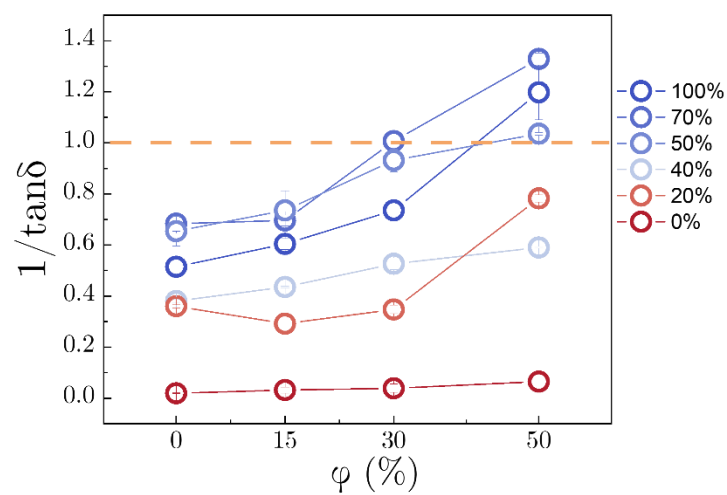

**Supplementary Fig. 20.** Plot of the inverse of loss factor  $1/\tan\delta=G'/G''$  as a function of ethanol volume fraction for coacervates prepared at different  $R$  values.

## Reference

1. Matsui, A., et al., The Effect of Ethanol on Disassembly of Amyloid- $\beta$ 1-42 Pentamer Revealed by Atomic Force Microscopy and Gel Electrophoresis. *International journal of molecular sciences*, 2022. **23**(2): p. 889.
2. Ormeno, D., et al., Ethanol reduces amyloid aggregation in vitro and prevents toxicity in cell lines. *Archives of medical research*, 2013. **44**(1): p. 1-7.
3. Hansen, J., et al., Interactions in protein solutions close to liquid–liquid phase separation: ethanol reduces attractions via changes of the dielectric solution properties. *Physical Chemistry Chemical Physics*, 2021. **23**(39): p. 22384-22394.
4. Nemzer, L.R., et al., *Ethanol shock and lysozyme aggregation*. *Soft Matter*, 2013. **9**(7): p. 2187-2196.
5. Meng, S., et al., *Effect of mixed solvents on polyelectrolyte complexes with salt*. *Colloid and Polymer Science*, 2020. **298**(7): p. 887-894.
6. Zhao, Q., et al., Underwater contact adhesion and microarchitecture in polyelectrolyte complexes actuated by solvent exchange. *Nature materials*, 2016. **15**(4): p. 407-412.
7. Danielsen, S.P., et al., Complexation of a Conjugated Polyelectrolyte and Impact on Optoelectronic Properties. *ACS Macro Letters*, 2019. **8**(1): p. 88-94.
8. Murray, K.A., et al., Identifying amyloid-related diseases by mapping mutations in low-complexity protein domains to pathologies. *Nature Structural & Molecular Biology*, 2022: p. 1-8.
9. Jahan, I. and S.M. Nayeem, Effect of urea, arginine, and ethanol concentration on aggregation of 179CVNITV184 fragment of sheep prion protein. *ACS omega*, 2018. **3**(9): p. 11727-11741.
10. Sun, J., J.D. Schiffman, and S.L. Perry, *Linear Viscoelasticity and Time–Alcohol Superposition of Chitosan/Hyaluronic Acid Complex Coacervates*. *ACS Applied Polymer Materials*, 2022. **4**(3): p. 1617-1625.
11. Fu, J., H.M. Fares, and J.B. Schlenoff, *Ion-pairing strength in polyelectrolyte complexes*. *Macromolecules*, 2017. **50**(3): p. 1066-1074.
12. Gu, Y., et al., Contraction of weak polyelectrolyte multilayers in response to organic solvents. *Soft Matter*, 2016. **12**(6): p. 1859-1867.

13. McQuarrie, D.A., *Statistical mechanics*. 2000: Sterling Publishing Company.
14. Zhang, P. and Z.-G. Wang, *Interfacial structure and tension of polyelectrolyte complex coacervates*. *Macromolecules*, 2021. **54**(23): p. 10994-11007.
15. Debye, P., The theory of electrolytes. I. Lowering of freezing point and related phenomena. *Physikalische Zeitschrift*, 1923. **24**: p. 185-206.
16. Overbeek, J.T.G. and M. Voorn, *Phase separation in polyelectrolyte solutions. Theory of complex coacervation*. *Journal of Cellular and Comparative Physiology*, 1957. **49**(S1): p. 7-26.
17. Baruch Leshem, A., et al., *Biomolecular condensates formed by designer minimalistic peptides*. *Nature Communications*, 2023. **14**(1): p. 421.
18. Brangwynne, C.P., P. Tompa, and R.V. Pappu, *Polymer physics of intracellular phase transitions*. *Nature Physics*, 2015. **11**(11): p. 899-904.
19. Israelachvili, J.N., *Intermolecular and surface forces*. 2011: Academic press.
20. Jouyban, A., S. Soltanpour, and H.-K. Chan, *A simple relationship between dielectric constant of mixed solvents with solvent composition and temperature*. *International journal of pharmaceutics*, 2004. **269**(2): p. 353-360.
21. Spruijt, E., et al., Relaxation dynamics at different time scales in electrostatic complexes: time-salt superposition. *Physical review letters*, 2010. **105**(20): p. 208301.
22. Han, C.D. and J.K. Kim, On the use of time-temperature superposition in multicomponent/multiphase polymer systems. *Polymer*, 1993. **34**(12): p. 2533-2539.
23. Kyte, J. and R.F. Doolittle, *A simple method for displaying the hydropathic character of a protein*. *Journal of molecular biology*, 1982. **157**(1): p. 105-132.
